# Supplementary material for: Transcriptomic Analysis Reveals Intrinsic Abnormalities in Endometrial Polyps
Source: MDPI journal article supplement (doi:10.3390/ijms25052557), 2024-02-22
Supplement: s1 [file s1]

**Supplementary Materials to**  
**Transcriptomic Analysis Reveals Intrinsic Abnormalities in Endometrial Polyps**

**Supplemental Figures**

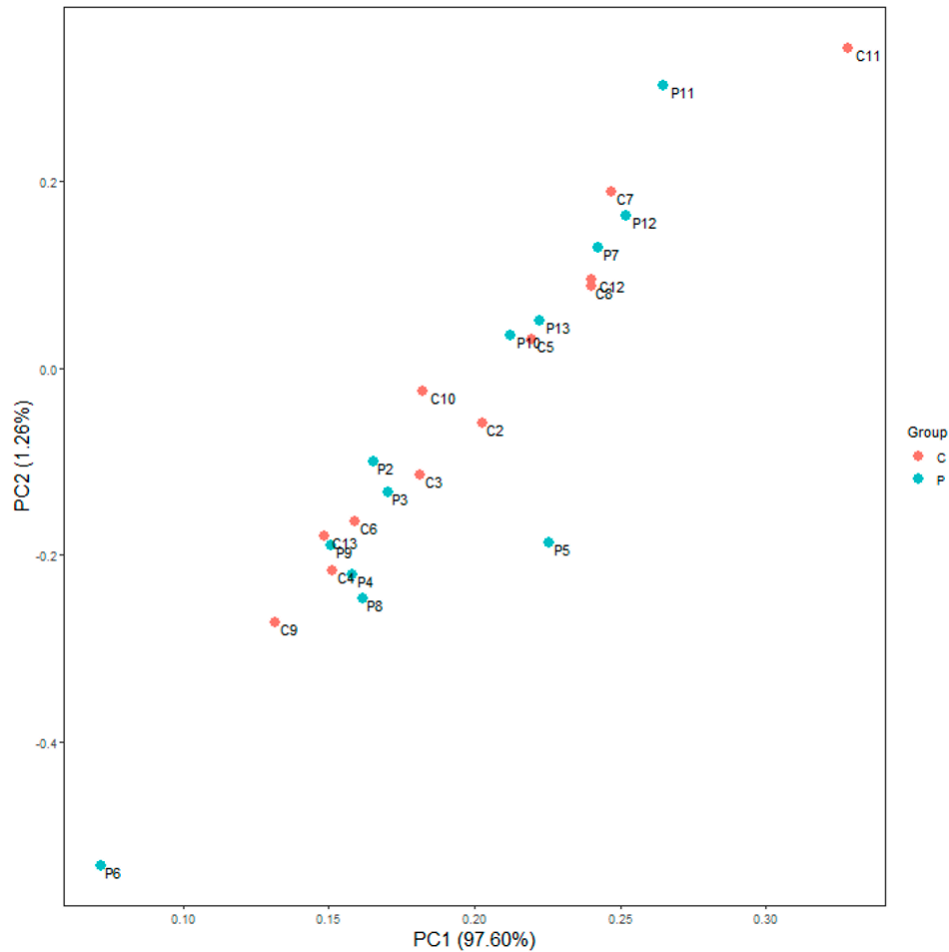

**Figure S1.** PCA analysis of the RNA-seq dataset presented in this study used the prcomp function in R packages. This figure has been redrawn and shown in Figure 1a.

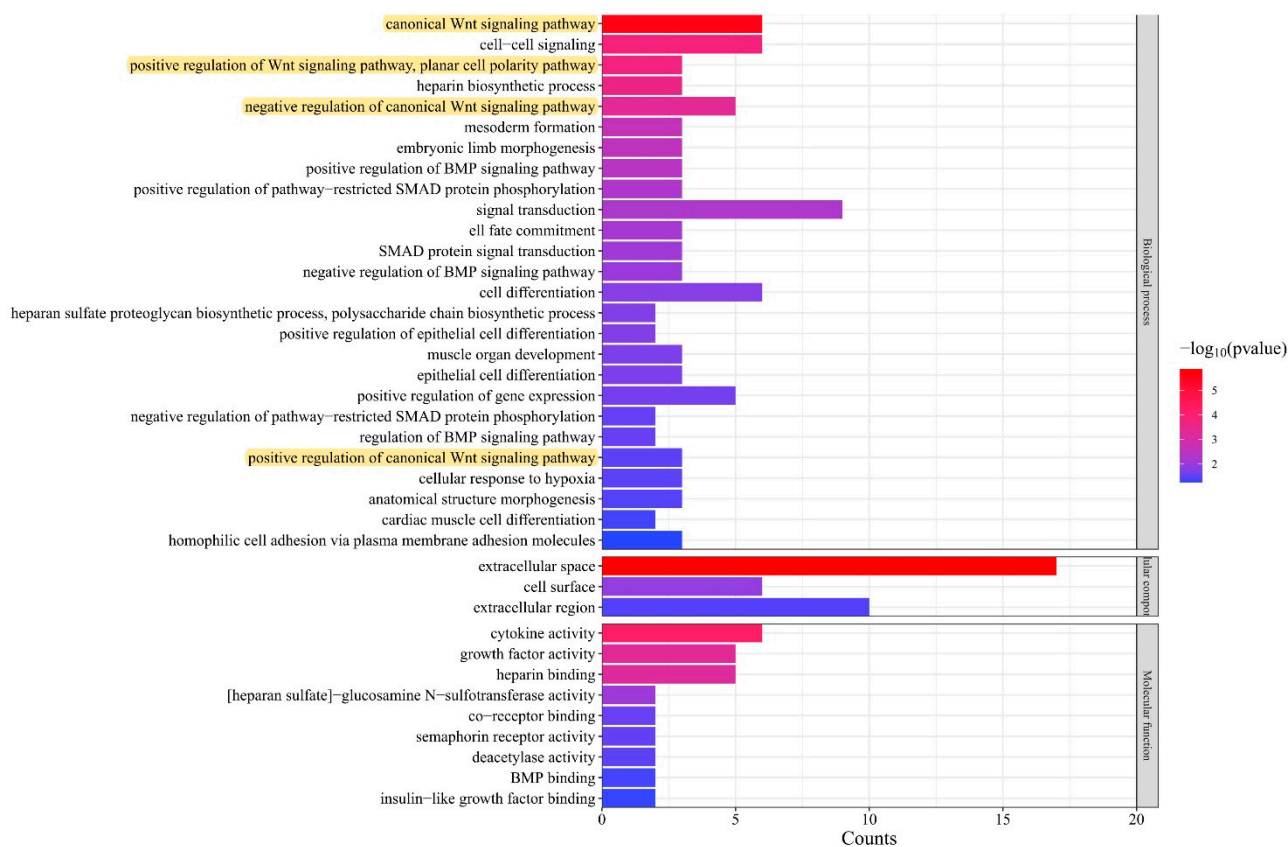

**Figure S2.** GO enrichment analysis for the DEGs in the PPI subcluster one.

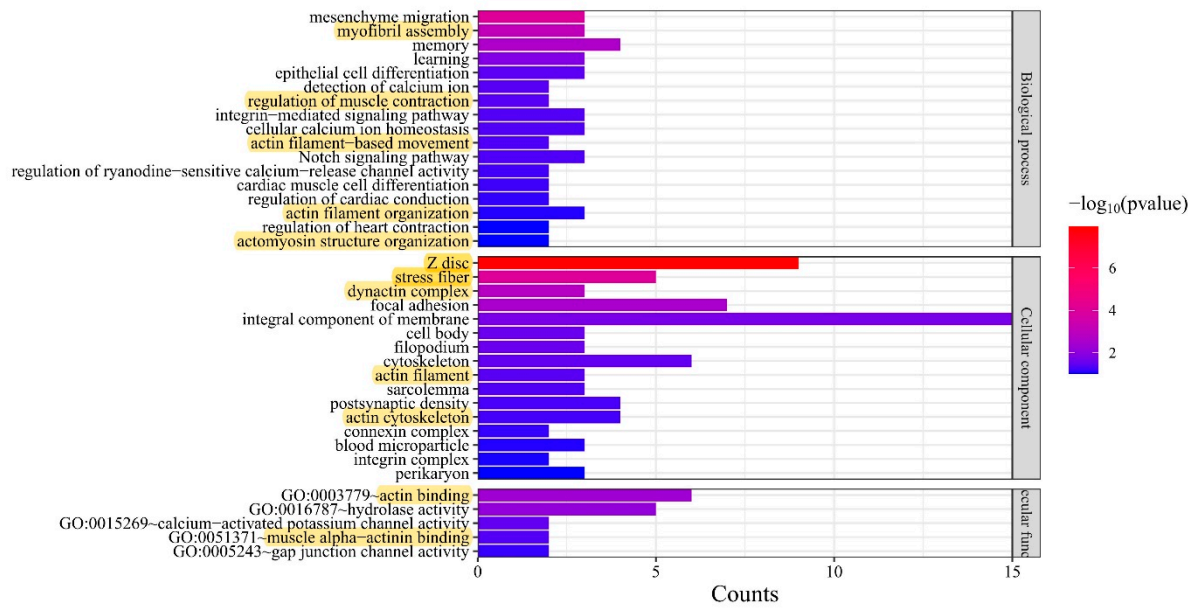

Figure S3. GO enrichment analysis for the DEGs in the PPI subcluster two.

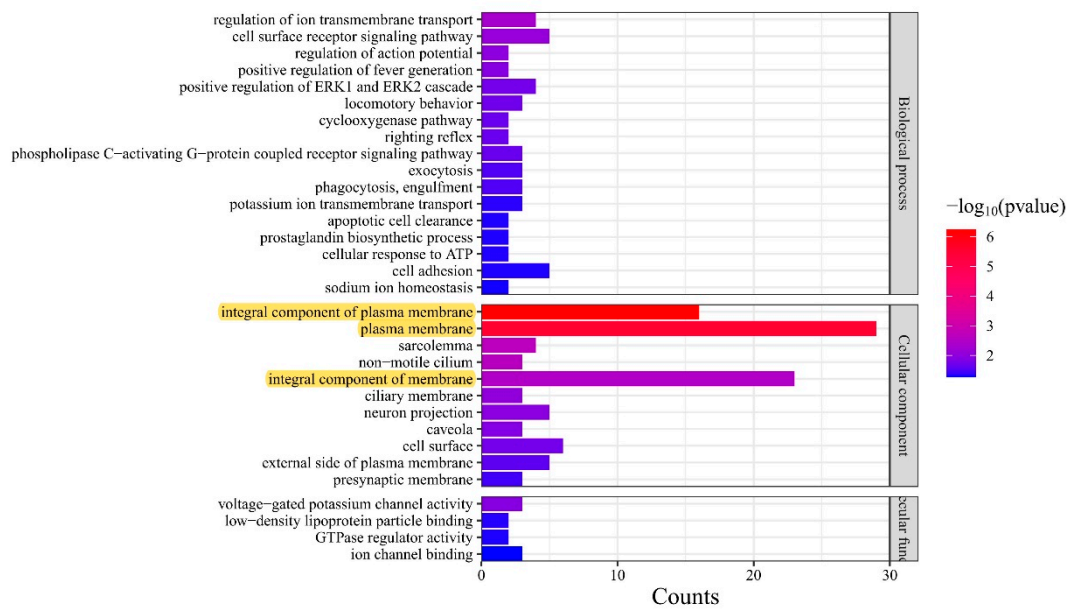

Figure S4. GO enrichment analysis for the DEGs in the PPI subcluster three.

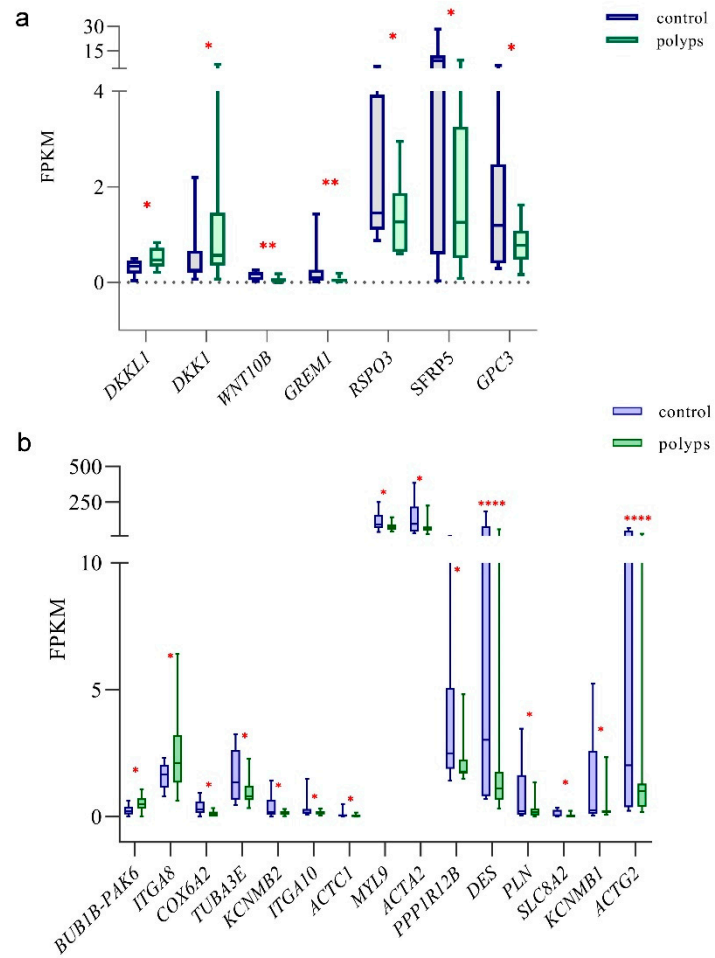

**Figure S5.** The boxplot of Wnt signaling pathway (a) and muscle function-related genes (b). \*  $p < 0.05$ , \*\*  $p < 0.01$ , , \*\*\*\*  $p < 0.0001$ .

## Supplemental Tables

**Table S1.** Physiological parameters of the subject.

| No. | Age | BMI   | Polyp size           | Endometrial thickness | OP day | Cycle interval | AMH   |
|-----|-----|-------|----------------------|-----------------------|--------|----------------|-------|
| 1   | 41  | 19.30 | 0.7*0.4cm            | 1.15                  | 9      | 25-29          |       |
| 2   | 41  | 20.03 | 0.52cm               | 1.2                   | 9      | 25-26          | 1.94  |
| 3   | 39  | 19.70 | no data              | 0.82                  | 10     | 28-30          | 2.65  |
| 4   | 43  | 24.10 | no data              | 0.8                   | 10     | 26-28          | 0.23  |
| 5   | 37  | 19.00 | 0.5cm, 0.2cm         | 0.83                  | 12     | 40-45          | 12.19 |
| 6   | 37  | 24.30 | no data              | 0.72                  | 9      | 45-60          | 6.09  |
| 7   | 39  | 24.56 | 0.3*0.1cm            | 1.02                  | 14     | 50-60          | 5.40  |
| 8   | 40  | 21.80 | 0.6*0.4cm, 0.4*0.4cm | 1.4                   | 11     | 20-25          | 2.75  |
| 9   | 37  | –     | 0.8*0.4cm            | not available         | 7      | 28-30          | 3.52  |
| 10  | 39  | 21.50 | no data              | 0.71                  | 13     | 26-28          | 3.85  |
| 11  | 40  | 19.70 | 0.7cm                | 0.9                   | 9      | 28-30          | 3.69  |
| 12  | 36  | 20.40 | 0.7*0.4cm            | 0.95                  | 7      | 25-28          | 3.68  |

OP: operation

**Table S2.** Comparison of gene expression levels between polyp tissue and corresponding adjacent endometrium.

| Symbol                    | Gene description                               | Gene ID         | Fold change -<br>P/C* | p-Value |
|---------------------------|------------------------------------------------|-----------------|-----------------------|---------|
| <b>Up-regulated genes</b> |                                                |                 |                       |         |
| AC112503.1                | -                                              | ENSG00000272678 | 17.0090               | 0.0332  |
| AC024084.1                | -                                              | ENSG00000230649 | 12.0701               | 0.0211  |
| MYT1L                     | myelin transcription factor 1 like             | ENSG00000186487 | 10.2414               | 0.0134  |
| AL031283.1                | -                                              | ENSG00000228140 | 10.1607               | 0.0356  |
| NDST3                     | N-deacetylase and N-sulfotransferase 3         | ENSG00000164100 | 7.0427                | 0.0129  |
| AC097375.1                | -                                              | ENSG00000248991 | 6.6300                | 0.0314  |
| NDST4                     | N-deacetylase and N-sulfotransferase 4         | ENSG00000138653 | 6.4560                | 0.0141  |
| AC018845.1                | -                                              | ENSG00000259821 | 6.4537                | 0.0497  |
| CLC                       | Charcot-Leyden crystal galectin                | ENSG00000105205 | 5.4192                | 0.0212  |
| HGC6.3                    | -                                              | ENSG00000235994 | 5.2353                | 0.0469  |
| BX470102.1                | -                                              | ENSG00000238279 | 5.0843                | 0.0357  |
| AADACL2-<br>AS1           | -                                              | ENSG00000242908 | 4.6991                | 0.0286  |
| HOXA13                    | homeobox A13                                   | ENSG00000106031 | 4.5808                | 0.0006  |
| FAM166A                   | family with sequence similarity 166 member A   | ENSG00000188163 | 4.1297                | 0.0457  |
| GJC3                      | gap junction protein gamma 3                   | ENSG00000176402 | 3.9476                | 0.0388  |
| AL049650.1                | novel transcript                               | ENSG00000256566 | 3.7906                | 0.0039  |
| KRT5                      | keratin 5                                      | ENSG00000186081 | 3.7371                | 0.0134  |
| PCDH15                    | protocadherin related 15                       | ENSG00000150275 | 3.6222                | 0.0333  |
| AC068831.1                | -                                              | ENSG00000258384 | 3.6177                | 0.0429  |
| AC097658.1                | -                                              | ENSG00000228981 | 3.5458                | 0.0484  |
| AL358075.2                | -                                              | ENSG00000227857 | 3.5039                | 0.0336  |
| MARCO                     | macrophage receptor with collagenous structure | ENSG00000019169 | 3.4373                | 0.0082  |
| AC004080.2                | -                                              | ENSG00000253508 | 3.3061                | 0.0433  |
| AL139005.1                | -                                              | ENSG00000279393 | 3.2746                | 0.0340  |
| AC073349.1                | -                                              | ENSG00000189316 | 3.0636                | 0.0362  |
| AL109811.3                | -                                              | ENSG00000277726 | 3.0141                | 0.0485  |
| TMCO1-AS1                 | -                                              | ENSG00000224358 | 2.9514                | 0.0071  |
| AC005256.1                | -                                              | ENSG00000267073 | 2.9241                | 0.0335  |
| MT-TM                     | mitochondrially encoded tRNA-Met (AUA/G)       | ENSG00000210112 | 2.8766                | 0.0260  |
| LINC01747                 | -                                              | ENSG00000230400 | 2.8689                | 0.0155  |
| AL034374.1                | -                                              | ENSG00000271367 | 2.6840                | 0.0432  |
| C4orf50                   | chromosome 4 open reading frame 50             | ENSG00000181215 | 2.6242                | 0.0243  |
| SYPL1P2                   | -                                              | ENSG00000265683 | 2.6093                | 0.0015  |
| CORIN                     | corin, serine peptidase                        | ENSG00000145244 | 2.5524                | 0.0115  |
| AC011479.4                | -                                              | ENSG00000286037 | 2.4865                | 0.0007  |
| AC074286.1                | -                                              | ENSG00000236501 | 2.4609                | 0.0370  |
| LRRC37A9P                 | -                                              | ENSG00000271013 | 2.4432                | 0.0082  |
| DKK1                      | dickkopf WNT signaling pathway inhibitor 1     | ENSG00000107984 | 2.4271                | 0.0239  |
| PYY2                      | peptide YY 2 (pseudogene)                      | ENSG00000237575 | 2.3960                | 0.0350  |
| TCAF2P1                   | TRPM8 channel associated factor 2 pseudogene 1 | ENSG00000159860 | 2.3908                | 0.0473  |

|            |                                                   |                 |        |        |
|------------|---------------------------------------------------|-----------------|--------|--------|
| AC107982.3 | -                                                 | ENSG00000265478 | 2.3839 | 0.0257 |
| AL034430.2 | -                                                 | ENSG00000285723 | 2.3408 | 0.0201 |
| AC112206.2 | -                                                 | ENSG00000249364 | 2.2848 | 0.0342 |
| CEP164P1   | centrosomal protein 164 pseudogene 1              | ENSG00000226937 | 2.1907 | 0.0273 |
| KRT36      | keratin 36                                        | ENSG00000126337 | 2.1672 | 0.0366 |
| AF064860.2 | -                                                 | ENSG00000231713 | 2.1630 | 0.0059 |
| AC079848.1 | -                                                 | ENSG00000250012 | 2.1031 | 0.0254 |
| AC093635.1 | -                                                 | ENSG00000272663 | 2.0967 | 0.0356 |
| IDH1-AS1   | IDH1 antisense RNA 1                              | ENSG00000231908 | 2.0888 | 0.0160 |
| AL355353.1 | -                                                 | ENSG00000270761 | 2.0813 | 0.0007 |
| CCN5       | cellular communication network factor 5           | ENSG00000064205 | 2.0692 | 0.0336 |
| ELAVL2     | ELAV like RNA binding protein 2                   | ENSG00000107105 | 2.0205 | 0.0482 |
| NELL2      | neural EGFL like 2                                | ENSG00000184613 | 2.0096 | 0.0391 |
| AL080250.1 | -                                                 | ENSG00000225793 | 2.0024 | 0.0133 |
| AC079250.1 | -                                                 | ENSG00000230979 | 1.9638 | 0.0046 |
| BUB1B-PAK6 | BUB1B-PAK6 readthrough                            | ENSG00000259288 | 1.9489 | 0.0287 |
| ATP13A4    | ATPase 13A4                                       | ENSG00000127249 | 1.9393 | 0.0254 |
| RPL10P19   | -                                                 | ENSG00000233609 | 1.9366 | 0.0498 |
| CXCL14     | C-X-C motif chemokine ligand 14                   | ENSG00000145824 | 1.9340 | 0.0477 |
| AL138752.2 | -                                                 | ENSG00000255872 | 1.9100 | 0.0421 |
| LINC00345  | long intergenic non-protein coding RNA 345        | ENSG00000235660 | 1.8788 | 0.0100 |
| AC138150.2 | -                                                 | ENSG00000267288 | 1.8650 | 0.0415 |
| AL513190.1 | -                                                 | ENSG00000278831 | 1.8511 | 0.0460 |
| AC010980.2 | -                                                 | ENSG00000267034 | 1.8326 | 0.0371 |
| AC099522.2 | -                                                 | ENSG00000272525 | 1.8168 | 0.0422 |
| IL13RA2    | interleukin 13 receptor subunit alpha 2           | ENSG00000123496 | 1.7976 | 0.0445 |
| GAS5-AS1   | GAS5 antisense RNA 1                              | ENSG00000270084 | 1.7860 | 0.0101 |
| AL137127.1 | -                                                 | ENSG00000272084 | 1.7763 | 0.0474 |
| BMP7       | bone morphogenetic protein 7                      | ENSG00000101144 | 1.7687 | 0.0178 |
| SH3GL2     | SH3 domain containing GRB2 like 2, endophilin A1  | ENSG00000107295 | 1.7380 | 0.0480 |
| AC090587.2 | -                                                 | ENSG00000229368 | 1.7056 | 0.0225 |
| LNCOC1     | -                                                 | ENSG00000253741 | 1.6878 | 0.0245 |
| AL445472.1 | -                                                 | ENSG00000227486 | 1.6730 | 0.0024 |
| IGFBPL1    | insulin like growth factor binding protein like 1 | ENSG00000137142 | 1.6536 | 0.0476 |
| SLITRK5    | SLIT and NTRK like family member 5                | ENSG00000165300 | 1.6531 | 0.0036 |
| TMEM71     | transmembrane protein 71                          | ENSG00000165071 | 1.6330 | 0.0130 |
| XKR4       | XK related 4                                      | ENSG00000206579 | 1.6104 | 0.0194 |
| MMP23B     | matrix metalloproteinase 23B                      | ENSG00000189409 | 1.6054 | 0.0469 |
| DKKL1      | dickkopf like acrosomal protein 1                 | ENSG00000104901 | 1.5993 | 0.0268 |
| PTGS2      | prostaglandin-endoperoxide synthase 2             | ENSG00000073756 | 1.5968 | 0.0465 |
| AC097468.3 | -                                                 | ENSG00000272644 | 1.5732 | 0.0304 |
| CHKB-DT    | CHKB divergent transcript                         | ENSG00000205559 | 1.5622 | 0.0249 |
| PHF24      | PHD finger protein 24                             | ENSG00000122733 | 1.5550 | 0.0395 |
| SULT1A2    | sulfotransferase family 1A member 2               | ENSG00000197165 | 1.5529 | 0.0073 |
| ADGRG5     | adhesion G protein-coupled receptor G5            | ENSG00000159618 | 1.5427 | 0.0004 |

|                             |                                                    |                 |          |        |
|-----------------------------|----------------------------------------------------|-----------------|----------|--------|
| <i>PCSK9</i>                | proprotein convertase subtilisin/kexin type 9      | ENSG00000169174 | 1.5334   | 0.0495 |
| <i>ITGA8</i>                | integrin subunit alpha 8                           | ENSG00000077943 | 1.5194   | 0.0236 |
| <i>MESP1</i>                | mesoderm posterior bHLH transcription factor 1     | ENSG00000166823 | 1.5055   | 0.0419 |
| <b>Down-regulated genes</b> |                                                    |                 |          |        |
| <i>TCAF2C</i>               | -                                                  | ENSG00000283528 | -32.2179 | 0.0056 |
| <i>HSPB3</i>                | heat shock protein family B (small) member 3       | ENSG00000169271 | -17.7291 | 0.0139 |
| <i>AL732292.2</i>           | -                                                  | ENSG00000273416 | -17.4308 | 0.0071 |
| <i>AL365475.1</i>           | -                                                  | ENSG00000261208 | -15.7675 | 0.0003 |
| <i>AC026740.3</i>           | -                                                  | ENSG00000286094 | -10.3148 | 0.0011 |
| <i>HAR1B</i>                | highly accelerated region 1B                       | ENSG00000231133 | -10.0735 | 0.0066 |
| <i>LINC01797</i>            | -                                                  | ENSG00000237179 | -9.9344  | 0.0146 |
| <i>CYP4A11</i>              | cytochrome P450 family 4 subfamily A member 11     | ENSG00000187048 | -9.7878  | 0.0308 |
| <i>CRHR2</i>                | corticotropin releasing hormone receptor 2         | ENSG00000106113 | -9.2399  | 0.0053 |
| <i>AC007849.1</i>           | -                                                  | ENSG00000242795 | -7.8240  | 0.0111 |
| <i>AL162741.1</i>           | -                                                  | ENSG00000260179 | -7.5134  | 0.0340 |
| <i>AC027601.5</i>           | -                                                  | ENSG00000279187 | -7.3344  | 0.0390 |
| <i>INE2</i>                 | -                                                  | ENSG00000281371 | -7.2866  | 0.0461 |
| <i>RBFOX3</i>               | RNA binding fox-1 homolog 3                        | ENSG00000167281 | -7.0444  | 0.0034 |
| <i>SERTM2</i>               | serine rich and transmembrane domain containing 2  | ENSG00000260802 | -7.0425  | 0.0308 |
| <i>IGHV3-43</i>             | immunoglobulin heavy variable 3-43                 | ENSG00000232216 | -6.9600  | 0.0040 |
| <i>MCHR1</i>                | melanin concentrating hormone receptor 1           | ENSG00000128285 | -6.8448  | 0.0166 |
| <i>DES</i>                  | desmin                                             | ENSG00000175084 | -6.0012  | 0.0000 |
| <i>ACTG2</i>                | actin, gamma 2, smooth muscle, enteric             | ENSG00000163017 | -5.8912  | 0.0000 |
| <i>LCMT1-AS2</i>            | -                                                  | ENSG00000260034 | -5.8442  | 0.0340 |
| <i>ZNF663P</i>              | zinc finger protein 663, pseudogene                | ENSG00000215452 | -5.6175  | 0.0052 |
| <i>OR4D1</i>                | olfactory receptor family 4 subfamily D member 1   | ENSG00000141194 | -5.6041  | 0.0288 |
| <i>AL132655.2</i>           | novel transcript                                   | ENSG00000268649 | -5.4190  | 0.0201 |
| <i>GLB1L3</i>               | galactosidase beta 1 like 3                        | ENSG00000166105 | -5.3165  | 0.0419 |
| <i>LEFTY2</i>               | left-right determination factor 2                  | ENSG00000143768 | -5.1569  | 0.0002 |
| <i>AC108448.2</i>           | -                                                  | ENSG00000236710 | -5.1111  | 0.0247 |
| <i>GCKR</i>                 | glucokinase regulator                              | ENSG00000084734 | -4.8905  | 0.0163 |
| <i>IGHV4-4</i>              | -                                                  | ENSG00000276775 | -4.8368  | 0.0306 |
| <i>ZSWIM8-AS1</i>           | ZSWIM8 antisense RNA 1                             | ENSG00000272589 | -4.8175  | 0.0468 |
| <i>AC006042.3</i>           | -                                                  | ENSG00000233264 | -4.5973  | 0.0481 |
| <i>AC008498.1</i>           | -                                                  | ENSG00000276945 | -4.5361  | 0.0340 |
| <i>IGHG3</i>                | immunoglobulin heavy constant gamma 3 (G3m marker) | ENSG00000211897 | -4.3554  | 0.0182 |
| <i>PGM5-AS1</i>             | PGM5 antisense RNA 1                               | ENSG00000224958 | -4.2846  | 0.0178 |
| <i>ADAMTS9-AS1</i>          | ADAMTS9 antisense RNA 1                            | ENSG00000241158 | -4.2108  | 0.0182 |
| <i>AC000120.2</i>           | -                                                  | ENSG00000285772 | -4.1982  | 0.0243 |
| <i>AC111152.2</i>           | -                                                  | ENSG00000259647 | -4.1950  | 0.0438 |
| <i>AC018845.3</i>           | -                                                  | ENSG00000261173 | -4.1629  | 0.0253 |
| <i>ATXN2-AS</i>             | -                                                  | ENSG00000258099 | -4.1460  | 0.0142 |
| <i>BX664615.1</i>           | -                                                  | ENSG00000229273 | -4.1279  | 0.0022 |
| <i>GREM1</i>                | gremlin 1, DAN family BMP antagonist               | ENSG00000166923 | -4.1039  | 0.0020 |



|            |                                                                                   |                 |         |        |
|------------|-----------------------------------------------------------------------------------|-----------------|---------|--------|
| AC007744.1 | -                                                                                 | ENSG00000271894 | -4.0853 | 0.0473 |
| AL442125.2 | -                                                                                 | ENSG00000276916 | -4.0497 | 0.0196 |
| TPTE2P6    | transmembrane phosphoinositide 3-phosphatase and<br>tensin homolog 2 pseudogene 6 | ENSG00000205822 | -3.9845 | 0.0420 |
| TCF23      | transcription factor 23                                                           | ENSG00000163792 | -3.7790 | 0.0051 |
| JPH2       | junctional protein 2                                                              | ENSG00000149596 | -3.7386 | 0.0194 |
| AC093510.2 | -                                                                                 | ENSG00000260871 | -3.7358 | 0.0399 |
| SFRP5      | secreted frizzled related protein 5                                               | ENSG00000120057 | -3.7216 | 0.0138 |
| IGKV1OR-2  | immunoglobulin kappa variable 1/OR-2 (pseudogene)                                 | ENSG00000156755 | -3.6770 | 0.0129 |
| AC092653.1 | -                                                                                 | ENSG00000273245 | -3.6401 | 0.0366 |
| MS4A1      | membrane spanning 4-domains A1                                                    | ENSG00000156738 | -3.6084 | 0.0147 |
| SCN7A      | sodium voltage-gated channel alpha subunit 7                                      | ENSG00000136546 | -3.6076 | 0.0371 |
| AP002812.5 | -                                                                                 | ENSG00000255449 | -3.5911 | 0.0477 |
| SORCS3     | sortilin related VPS10 domain containing receptor 3                               | ENSG00000156395 | -3.5611 | 0.0163 |
| WSCD2      | WSC domain containing 2                                                           | ENSG00000075035 | -3.4796 | 0.0073 |
| MPPED1     | metallophosphoesterase domain containing 1                                        | ENSG00000186732 | -3.3978 | 0.0196 |
| AC084018.1 | -                                                                                 | ENSG00000272849 | -3.3392 | 0.0187 |
| KCNMB1     | potassium calcium-activated channel subfamily M<br>regulatory beta subunit 1      | ENSG00000145936 | -3.2896 | 0.0180 |
| AL133338.2 | -                                                                                 | ENSG00000270987 | -3.2496 | 0.0235 |
| RRH        | retinal pigment epithelium-derived rhodopsin homolog                              | ENSG00000180245 | -3.2354 | 0.0465 |
| CNN1       | calponin 1                                                                        | ENSG00000130176 | -3.2212 | 0.0039 |
| RYR3       | ryanodine receptor 3                                                              | ENSG00000198838 | -3.1946 | 0.0310 |
| COX6A2     | cytochrome c oxidase subunit 6A2                                                  | ENSG00000156885 | -3.1561 | 0.0161 |
| SSTR3      | -                                                                                 | ENSG00000278195 | -3.1420 | 0.0151 |
| ZNF534     | zinc finger protein 534                                                           | ENSG00000198633 | -3.1096 | 0.0396 |
| IL12A-AS1  | IL12A antisense RNA 1                                                             | ENSG00000244040 | -3.0590 | 0.0472 |
| LINC01869  | -                                                                                 | ENSG00000180279 | -3.0172 | 0.0382 |
| SLC8A2     | solute carrier family 8 member A2                                                 | ENSG00000118160 | -2.9845 | 0.0247 |
| GJA3       | gap junction protein alpha 3                                                      | ENSG00000121743 | -2.9793 | 0.0032 |
| ZNF197-AS1 | ZNF197 antisense RNA 1                                                            | ENSG00000233509 | -2.9641 | 0.0413 |
| AF287957.1 | -                                                                                 | ENSG00000271743 | -2.9481 | 0.0065 |
| ACTC1      | actin, alpha, cardiac muscle 1                                                    | ENSG00000159251 | -2.9185 | 0.0379 |
| PLN        | phospholamban                                                                     | ENSG00000198523 | -2.8969 | 0.0386 |
| WNT10B     | Wnt family member 10B                                                             | ENSG00000169884 | -2.8959 | 0.0020 |
| AC007161.3 | -                                                                                 | ENSG00000283549 | -2.8845 | 0.0166 |
| PTGIS      | prostaglandin I2 synthase                                                         | ENSG00000124212 | -2.8666 | 0.0050 |
| PTH2R      | parathyroid hormone 2 receptor                                                    | ENSG00000144407 | -2.8543 | 0.0076 |
| SNTG2      | syntrophin gamma 2                                                                | ENSG00000172554 | -2.8433 | 0.0153 |
| NEURL1     | neuralized E3 ubiquitin protein ligase 1                                          | ENSG00000107954 | -2.8361 | 0.0038 |
| VAT1L      | vesicle amine transport 1 like                                                    | ENSG00000171724 | -2.8304 | 0.0154 |
| AP001107.5 | -                                                                                 | ENSG00000254510 | -2.8263 | 0.0121 |
| AC119396.1 | -                                                                                 | ENSG00000263264 | -2.7972 | 0.0193 |
| IL17B      | interleukin 17B                                                                   | ENSG00000127743 | -2.7715 | 0.0498 |
| ADARB2     | adenosine deaminase, RNA specific B2 (inactive)                                   | ENSG00000185736 | -2.7674 | 0.0220 |
| AL121749.1 | -                                                                                 | ENSG00000273312 | -2.7554 | 0.0110 |
| AL359510.2 | -                                                                                 | ENSG00000280157 | -2.7267 | 0.0064 |

|             |                                                                           |                 |         |        |
|-------------|---------------------------------------------------------------------------|-----------------|---------|--------|
| AP000892.3  | -                                                                         | ENSG00000280143 | -2.7171 | 0.0134 |
| AL353719.1  | -                                                                         | ENSG00000260475 | -2.6939 | 0.0412 |
| HAVCR1      | hepatitis A virus cellular receptor 1                                     | ENSG00000113249 | -2.6858 | 0.0203 |
| PTGER3      | prostaglandin E receptor 3                                                | ENSG00000050628 | -2.6642 | 0.0099 |
| KCNB1       | potassium voltage-gated channel subfamily B member 1                      | ENSG00000158445 | -2.6459 | 0.0074 |
| ITGB1BP2    | integrin subunit beta 1 binding protein 2                                 | ENSG00000147166 | -2.6359 | 0.0272 |
| GAL3ST3     | galactose-3-O-sulfotransferase 3                                          | ENSG00000175229 | -2.6180 | 0.0251 |
| KCNMB2      | potassium calcium-activated channel subfamily M regulatory beta subunit 2 | ENSG00000197584 | -2.6126 | 0.0117 |
| CD36        | CD36 molecule                                                             | ENSG00000135218 | -2.5829 | 0.0310 |
| LILRP2      | leukocyte immunoglobulin-like receptor pseudogene 2                       | ENSG00000170858 | -2.5479 | 0.0024 |
| MSTN        | myostatin                                                                 | ENSG00000138379 | -2.5346 | 0.0202 |
| FGF17       | fibroblast growth factor 17                                               | ENSG00000158815 | -2.5209 | 0.0138 |
| KERA        | keratocan                                                                 | ENSG00000139330 | -2.5204 | 0.0155 |
| AC139491.2  | -                                                                         | ENSG00000248596 | -2.5119 | 0.0116 |
| AC104695.3  | -                                                                         | ENSG00000270210 | -2.4957 | 0.0421 |
| AC093827.3  | -                                                                         | ENSG00000251411 | -2.4937 | 0.0470 |
| ACSM1       | acyl-CoA synthetase medium chain family member 1                          | ENSG00000166743 | -2.4647 | 0.0368 |
| CD79A       | CD79a molecule                                                            | ENSG00000105369 | -2.4497 | 0.0051 |
| PDLIM3      | PDZ and LIM domain 3                                                      | ENSG00000154553 | -2.4366 | 0.0255 |
| SLX1A       | SLX1 homolog A, structure-specific endonuclease subunit                   | ENSG00000132207 | -2.4298 | 0.0376 |
| AP003392.5  | -                                                                         | ENSG00000271751 | -2.4268 | 0.0446 |
| PRELP       | proline and arginine rich end leucine rich repeat protein                 | ENSG00000188783 | -2.3832 | 0.0451 |
| SEL1L2      | SEL1L2, ERAD E3 ligase adaptor subunit                                    | ENSG00000101251 | -2.3824 | 0.0297 |
| LMOD1       | leiomodoin 1                                                              | ENSG00000163431 | -2.3572 | 0.0042 |
| CHRD12      | chordin like 2                                                            | ENSG00000054938 | -2.3533 | 0.0003 |
| AC006116.11 | -                                                                         | ENSG00000285996 | -2.3431 | 0.0231 |
| REGG        | RAS like estrogen regulated growth inhibitor                              | ENSG00000134533 | -2.3348 | 0.0019 |
| AL391845.2  | -                                                                         | ENSG00000233542 | -2.3269 | 0.0383 |
| AC011472.4  | -                                                                         | ENSG00000273733 | -2.3266 | 0.0111 |
| ANGPTL1     | angiopoietin like 1                                                       | ENSG00000116194 | -2.3090 | 0.0250 |
| CCDC168     | coiled-coil domain containing 168                                         | ENSG00000175820 | -2.2713 | 0.0267 |
| LINC01305   | -                                                                         | ENSG00000231453 | -2.2552 | 0.0471 |
| AL391244.1  | -                                                                         | ENSG00000225905 | -2.2509 | 0.0310 |
| AC090772.3  | -                                                                         | ENSG00000265750 | -2.2427 | 0.0148 |
| TAGLN       | transgelin                                                                | ENSG00000149591 | -2.2364 | 0.0102 |
| SPATA1      | spermatogenesis associated 1                                              | ENSG00000122432 | -2.2254 | 0.0194 |
| GUSBP4      | glucuronidase, beta pseudogene 4                                          | ENSG00000239650 | -2.2165 | 0.0475 |
| BTNL9       | butyrophilin like 9                                                       | ENSG00000165810 | -2.2000 | 0.0040 |
| INMT        | indolethylamine N-methyltransferase                                       | ENSG00000241644 | -2.1987 | 0.0275 |
| LINC02495   | -                                                                         | ENSG00000249896 | -2.1947 | 0.0040 |
| SMIM38      | -                                                                         | ENSG00000284713 | -2.1936 | 0.0480 |
| LSMEM1      | leucine rich single-pass membrane protein 1                               | ENSG00000181016 | -2.1890 | 0.0263 |
| AC011498.2  | -                                                                         | ENSG00000267030 | -2.1666 | 0.0037 |
| LINC01607   | -                                                                         | ENSG00000272138 | -2.1573 | 0.0148 |
| AC092376.1  | -                                                                         | ENSG00000261722 | -2.1473 | 0.0436 |

|                   |                                                                                 |                 |         |        |
|-------------------|---------------------------------------------------------------------------------|-----------------|---------|--------|
| <i>HERC2P8</i>    | hect domain and RLD 2 pseudogene 8                                              | ENSG00000261599 | -2.1460 | 0.0388 |
| <i>LINC01936</i>  | -                                                                               | ENSG00000235997 | -2.1439 | 0.0094 |
| <i>AC127521.1</i> | -                                                                               | ENSG00000262823 | -2.1189 | 0.0329 |
| <i>AL360181.2</i> | -                                                                               | ENSG00000235245 | -2.1038 | 0.0261 |
| <i>KCNQ4</i>      | potassium voltage-gated channel subfamily Q member 4                            | ENSG00000117013 | -2.0969 | 0.0307 |
| <i>SLC2A4</i>     | solute carrier family 2 member 4                                                | ENSG00000181856 | -2.0896 | 0.0357 |
| <i>GPC3</i>       | glypican 3                                                                      | ENSG00000147257 | -2.0701 | 0.0145 |
| <i>AC108925.1</i> | -                                                                               | ENSG00000286010 | -2.0691 | 0.0259 |
| <i>PPM1N</i>      | protein phosphatase, Mg <sup>2+</sup> /Mn <sup>2+</sup> dependent 1N (putative) | ENSG00000213889 | -2.0625 | 0.0405 |
| <i>Z93930.2</i>   | -                                                                               | ENSG00000226471 | -2.0624 | 0.0376 |
| <i>SP9</i>        | Sp9 transcription factor                                                        | ENSG00000217236 | -2.0588 | 0.0186 |
| <i>OR2C3</i>      | olfactory receptor family 2 subfamily C member 3                                | ENSG00000196242 | -2.0352 | 0.0302 |
| <i>ACTG1P17</i>   | -                                                                               | ENSG00000259315 | -2.0335 | 0.0188 |
| <i>CRB2</i>       | crumbs cell polarity complex component 2                                        | ENSG00000148204 | -2.0294 | 0.0193 |
| <i>LINGO2</i>     | leucine rich repeat and Ig domain containing 2                                  | ENSG00000174482 | -2.0262 | 0.0110 |
| <i>PCDHA7</i>     | protocadherin alpha 7                                                           | ENSG00000204963 | -1.9913 | 0.0102 |
| <i>PCP2</i>       | Purkinje cell protein 2                                                         | ENSG00000174788 | -1.9543 | 0.0245 |
| <i>REP15</i>      | RAB15 effector protein                                                          | ENSG00000174236 | -1.9366 | 0.0043 |
| <i>ITGA10</i>     | integrin subunit alpha 10                                                       | ENSG00000143127 | -1.9358 | 0.0228 |
| <i>ZCCHC12</i>    | zinc finger CCHC-type containing 12                                             | ENSG00000174460 | -1.9244 | 0.0035 |
| <i>LINC01366</i>  | -                                                                               | ENSG00000235172 | -1.9146 | 0.0348 |
| <i>SORCS1</i>     | sortilin related VPS10 domain containing receptor 1                             | ENSG00000108018 | -1.9130 | 0.0140 |
| <i>AC116407.2</i> | -                                                                               | ENSG00000277511 | -1.9118 | 0.0412 |
| <i>GPR55</i>      | G protein-coupled receptor 55                                                   | ENSG00000135898 | -1.9076 | 0.0271 |
| <i>PCDHGB5</i>    | -                                                                               | ENSG00000276547 | -1.8931 | 0.0041 |
| <i>PPP1R12B</i>   | protein phosphatase 1 regulatory subunit 12B                                    | ENSG00000077157 | -1.8808 | 0.0041 |
| <i>ACTA2</i>      | actin, alpha 2, smooth muscle, aorta                                            | ENSG00000107796 | -1.8762 | 0.0264 |
| <i>PLXNB3</i>     | plexin B3                                                                       | ENSG00000198753 | -1.8701 | 0.0149 |
| <i>AKR1C2</i>     | aldo-keto reductase family 1 member C2                                          | ENSG00000151632 | -1.8660 | 0.0375 |
| <i>MAMDC2</i>     | MAM domain containing 2                                                         | ENSG00000165072 | -1.8482 | 0.0035 |
| <i>CACNB2</i>     | calcium voltage-gated channel auxiliary subunit beta 2                          | ENSG00000165995 | -1.8458 | 0.0278 |
| <i>AKR7L</i>      | aldo-keto reductase family 7 like (gene/pseudogene)                             | ENSG00000211454 | -1.8362 | 0.0256 |
| <i>AL662899.2</i> | novel protein                                                                   | ENSG00000263020 | -1.8360 | 0.0110 |
| <i>AC114490.1</i> | -                                                                               | ENSG00000241014 | -1.8338 | 0.0070 |
| <i>AC109449.1</i> | -                                                                               | ENSG00000259940 | -1.8313 | 0.0408 |
| <i>AC026202.2</i> | -                                                                               | ENSG00000233912 | -1.8113 | 0.0221 |
| <i>PGM5</i>       | phosphoglucomutase 5                                                            | ENSG00000154330 | -1.8100 | 0.0492 |
| <i>CCDC144NL</i>  | -                                                                               | ENSG00000233098 | -1.7998 | 0.0114 |
| <i>-AS1</i>       |                                                                                 |                 |         |        |
| <i>SLC7A3</i>     | solute carrier family 7 member 3                                                | ENSG00000165349 | -1.7964 | 0.0371 |
| <i>AL355312.2</i> | -                                                                               | ENSG00000231760 | -1.7901 | 0.0300 |
| <i>AC126773.2</i> | -                                                                               | ENSG00000260577 | -1.7788 | 0.0282 |
| <i>FBXL22</i>     | F-box and leucine rich repeat protein 22                                        | ENSG00000197361 | -1.7728 | 0.0065 |
| <i>TRPC4</i>      | transient receptor potential cation channel subfamily C member 4                | ENSG00000133107 | -1.7699 | 0.0374 |

|                   |                                                                                      |                 |         |        |
|-------------------|--------------------------------------------------------------------------------------|-----------------|---------|--------|
| <i>GAS1</i>       | growth arrest specific 1                                                             | ENSG00000180447 | -1.7604 | 0.0026 |
| <i>HIST2H2BA</i>  | histone cluster 2 H2B family member a (pseudogene)                                   | ENSG00000223345 | -1.7595 | 0.0173 |
| <i>AC092667.1</i> | -                                                                                    | ENSG00000230393 | -1.7474 | 0.0355 |
| <i>NFASC</i>      | neurofascin                                                                          | ENSG00000163531 | -1.7422 | 0.0404 |
| <i>RSPO3</i>      | R-spondin 3                                                                          | ENSG00000146374 | -1.7355 | 0.0187 |
| <i>LINC00622</i>  | long intergenic non-protein coding RNA 622                                           | ENSG00000260941 | -1.7348 | 0.0411 |
| <i>RIMS1</i>      | regulating synaptic membrane exocytosis 1                                            | ENSG00000079841 | -1.7343 | 0.0385 |
| <i>RASSF10</i>    | Ras association domain family member 10                                              | ENSG00000189431 | -1.7305 | 0.0351 |
| <i>PIPOX</i>      | pipecolic acid and sarcosine oxidase                                                 | ENSG00000179761 | -1.7198 | 0.0316 |
| <i>SORBS1</i>     | sorbin and SH3 domain containing 1                                                   | ENSG00000095637 | -1.7106 | 0.0243 |
| <i>HIF3A</i>      | hypoxia inducible factor 3 subunit alpha                                             | ENSG00000124440 | -1.7035 | 0.0464 |
| <i>ASB2</i>       | ankyrin repeat and SOCS box containing 2                                             | ENSG00000100628 | -1.6956 | 0.0190 |
| <i>AC133552.2</i> | -                                                                                    | ENSG00000262587 | -1.6917 | 0.0450 |
| <i>TMEM145</i>    | transmembrane protein 145                                                            | ENSG00000167619 | -1.6872 | 0.0284 |
| <i>NCAM1</i>      | neural cell adhesion molecule 1                                                      | ENSG00000149294 | -1.6858 | 0.0274 |
| <i>SLC25A27</i>   | solute carrier family 25 member 27                                                   | ENSG00000153291 | -1.6850 | 0.0025 |
| <i>CAHM</i>       | colon adenocarcinoma hypermethylated                                                 | ENSG00000270419 | -1.6812 | 0.0391 |
| <i>PCDHGA1</i>    | protocadherin gamma subfamily A, 1                                                   | ENSG00000204956 | -1.6753 | 0.0078 |
| <i>AP003774.1</i> | novel transcript                                                                     | ENSG00000181908 | -1.6676 | 0.0333 |
| <i>AC156455.1</i> | -                                                                                    | ENSG00000256546 | -1.6674 | 0.0166 |
| <i>ANGPT1</i>     | angiopoietin 1                                                                       | ENSG00000154188 | -1.6641 | 0.0136 |
| <i>DRD2</i>       | dopamine receptor D2                                                                 | ENSG00000149295 | -1.6503 | 0.0453 |
| <i>KIR2DL1</i>    | killer cell immunoglobulin like receptor, two Ig domains and long cytoplasmic tail 1 | ENSG00000125498 | -1.6435 | 0.0111 |
| <i>KIR2DL3</i>    | killer cell immunoglobulin like receptor, two Ig domains and long cytoplasmic tail 3 | ENSG00000243772 | -1.6424 | 0.0229 |
| <i>AP000873.2</i> | -                                                                                    | ENSG00000247137 | -1.6415 | 0.0280 |
| <i>NEXN</i>       | nexilin F-actin binding protein                                                      | ENSG00000162614 | -1.6395 | 0.0187 |
| <i>AC103740.1</i> | -                                                                                    | ENSG00000259370 | -1.6385 | 0.0227 |
| <i>AC083843.3</i> | -                                                                                    | ENSG00000259820 | -1.6351 | 0.0115 |
| <i>LINC02610</i>  | long intergenic non-protein coding RNA 2610                                          | ENSG00000186235 | -1.6342 | 0.0142 |
| <i>TAGAP</i>      | T cell activation RhoGTPase activating protein                                       | ENSG00000164691 | -1.6330 | 0.0095 |
| <i>ALDH1A3</i>    | aldehyde dehydrogenase 1 family member A3                                            | ENSG00000184254 | -1.6326 | 0.0052 |
| <i>AC015813.2</i> | novel transcript                                                                     | ENSG00000266086 | -1.6320 | 0.0389 |
| <i>CARMN</i>      | cardiac mesoderm enhancer-associated non-coding RNA                                  | ENSG00000249669 | -1.6277 | 0.0440 |
| <i>TUBA3E</i>     | tubulin alpha 3e                                                                     | ENSG00000152086 | -1.6255 | 0.0382 |
| <i>ISM2</i>       | isthmin 2                                                                            | ENSG00000100593 | -1.6182 | 0.0332 |
| <i>RFLNA</i>      | refilin A                                                                            | ENSG00000178882 | -1.6136 | 0.0421 |
| <i>AC084824.1</i> | -                                                                                    | ENSG00000257511 | -1.6020 | 0.0312 |
| <i>GATA6</i>      | GATA binding protein 6                                                               | ENSG00000141448 | -1.6019 | 0.0221 |
| <i>PDZRN3-AS1</i> | PDZRN3 antisense RNA 1                                                               | ENSG00000239677 | -1.5997 | 0.0120 |
| <i>SHISAL1</i>    | shisa like 1                                                                         | ENSG00000138944 | -1.5994 | 0.0219 |
| <i>SNAP25</i>     | synaptosome associated protein 25                                                    | ENSG00000132639 | -1.5839 | 0.0398 |
| <i>SPEG</i>       | striated muscle enriched protein kinase                                              | ENSG00000072195 | -1.5825 | 0.0430 |
| <i>ZBP1</i>       | Z-DNA binding protein 1                                                              | ENSG00000124256 | -1.5753 | 0.0243 |

|                   |                                                                                   |                 |         |        |
|-------------------|-----------------------------------------------------------------------------------|-----------------|---------|--------|
| <i>TPTE2P1</i>    | transmembrane phosphoinositide 3-phosphatase and<br>tensin homolog 2 pseudogene 1 | ENSG00000253771 | -1.5691 | 0.0058 |
| <i>SCNN1D</i>     | sodium channel epithelial 1 delta subunit                                         | ENSG00000162572 | -1.5634 | 0.0052 |
| <i>LINC01355</i>  | -                                                                                 | ENSG00000261326 | -1.5470 | 0.0393 |
| <i>AC105345.1</i> | -                                                                                 | ENSG00000205959 | -1.5354 | 0.0133 |
| <i>TSPAN32</i>    | tetraspanin 32                                                                    | ENSG00000064201 | -1.5348 | 0.0343 |
| <i>LIMS2</i>      | LIM zinc finger domain containing 2                                               | ENSG00000072163 | -1.5325 | 0.0270 |
| <i>WBP2NL</i>     | WBP2 N-terminal like                                                              | ENSG00000183066 | -1.5262 | 0.0175 |
| <i>AC002094.1</i> | -                                                                                 | ENSG00000258924 | -1.5204 | 0.0235 |
| <i>CSDC2</i>      | cold shock domain containing C2                                                   | ENSG00000172346 | -1.5192 | 0.0352 |
| <i>NPIP14P</i>    | -                                                                                 | ENSG00000226232 | -1.5164 | 0.0467 |
| <i>AL355987.4</i> | -                                                                                 | ENSG00000273066 | -1.5144 | 0.0213 |
| <i>WIPF3</i>      | WAS/WASL interacting protein family member 3                                      | ENSG00000122574 | -1.5122 | 0.0087 |
| <i>SYNPO2</i>     | synaptopodin 2                                                                    | ENSG00000172403 | -1.5103 | 0.0105 |
| <i>PVRIG</i>      | PVR related immunoglobulin domain containing                                      | ENSG00000213413 | -1.5092 | 0.0125 |
| <i>FAM225A</i>    | family with sequence similarity 225 member A                                      | ENSG00000231528 | -1.5067 | 0.0042 |
| <i>FILIP1L</i>    | filamin A interacting protein 1 like                                              | ENSG00000168386 | -1.5036 | 0.0125 |
| <i>AC092376.2</i> | -                                                                                 | ENSG00000277954 | -1.5017 | 0.0401 |
| <i>MYL9</i>       | myosin light chain 9                                                              | ENSG00000101335 | -1.5013 | 0.0181 |

---

\*P/C: polyp/control

**Table S3.** Comparison of expression levels of genes related to the Wnt signal pathway and muscle function.

| Symbol                                     | Gene description                                                          | Gene ID         | Fold change - P/C* | p-Value               |
|--------------------------------------------|---------------------------------------------------------------------------|-----------------|--------------------|-----------------------|
| <b>Wnt signaling pathway-related genes</b> |                                                                           |                 |                    |                       |
| <i>DKK1</i>                                | dickkopf WNT signaling pathway inhibitor 1                                | ENSG00000107984 | 2.4271             | 0.0239                |
| <i>DKKL1</i>                               | dickkopf like acrosomal protein 1                                         | ENSG00000104901 | 1.5993             | 0.0268                |
| <i>WNT10B</i>                              | Wnt family member 10B                                                     | ENSG00000169884 | -2.8959            | 0.0020                |
| <i>GREM1</i>                               | gremlin 1, DAN family BMP antagonist                                      | ENSG00000166923 | -4.1039            | 0.0020                |
| <i>RSPO3</i>                               | R-spondin 3                                                               | ENSG00000146374 | -1.7355            | 0.0187                |
| <i>SFRP5</i>                               | secreted frizzled related protein 5                                       | ENSG00000120057 | -3.7216            | 0.0138                |
| <i>GPC3</i>                                | glypican 3                                                                | ENSG00000147257 | -2.0701            | 0.0145                |
| <b>Muscle function-related genes</b>       |                                                                           |                 |                    |                       |
| <i>BUB1B-PAK6</i>                          | BUB1B-PAK6 readthrough                                                    | ENSG00000259288 | 1.9489             | 0.0287                |
| <i>ITGA8</i>                               | integrin subunit alpha 8                                                  | ENSG00000077943 | 1.5194             | 0.0236                |
| <i>COX6A2</i>                              | cytochrome c oxidase subunit 6A2                                          | ENSG00000156885 | -3.1561            | 0.0161                |
| <i>TUBA3E</i>                              | tubulin alpha 3e                                                          | ENSG00000152086 | -1.6255            | 0.0382                |
| <i>KCNMB2</i>                              | potassium calcium-activated channel subfamily M regulatory beta subunit 2 | ENSG00000197584 | -2.6126            | 0.0117                |
| <i>ITGA10</i>                              | integrin subunit alpha 10                                                 | ENSG00000143127 | -1.9358            | 0.0228                |
| <i>ACTC1</i>                               | actin, alpha, cardiac muscle 1                                            | ENSG00000159251 | -2.9185            | 0.0379                |
| <i>MYL9</i>                                | myosin light chain 9                                                      | ENSG00000101335 | -1.5013            | 0.0181                |
| <i>ACTA2</i>                               | actin, alpha 2, smooth muscle, aorta                                      | ENSG00000107796 | -1.8762            | 0.0264                |
| <i>PPP1R12B</i>                            | protein phosphatase 1 regulatory subunit 12B                              | ENSG00000077157 | -1.8808            | 0.0041                |
| <i>DES</i>                                 | desmin                                                                    | ENSG00000175084 | -6.0012            | $1.44 \times 10^{-9}$ |
| <i>PLN</i>                                 | phospholamban                                                             | ENSG00000198523 | -2.8969            | 0.0386                |
| <i>SLC8A2</i>                              | solute carrier family 8 member A2                                         | ENSG00000118160 | -2.9845            | 0.0247                |
| <i>KCNMB1</i>                              | potassium calcium-activated channel subfamily M regulatory beta subunit 1 | ENSG00000145936 | -3.2896            | 0.0180                |

\*P/C: polyp/control

**Table S4.** Summary of real-time PCR Primers.

| Gene name | Accession no. | Forward primers (5' to 3') | Reverse primers (5' to 3') | Product size (bp) |
|-----------|---------------|----------------------------|----------------------------|-------------------|
| ACTG2     | NM_001615     | GACAGGATGCAGAAGGAGA        | TGGAAGGTGGAGAGAGAGG        | 128               |
| CNN1      | NM_001299     | TTCCCTGTTTTCCCCCA          | CTCTCTCCAACTCTAACCCCT      | 137               |
| DES       | NM_001382709  | GCTGCTGGACTTCTCACT         | GCGCACCTTCTCGATGTA         | 121               |
| GPC3      | NM_004484     | ACCATCAAGTTGTGCCAAA        | GGAGGGAGTGAGAGAGAAAAG      | 80                |
| HOXA13    | NM_000522     | GGGAGAGAAAAGAAAGGAGGAA     | GACACATGCAGACCCAAC         | 118               |
| LEFTY2    | NM_003240     | TTCCCCCAAATACTGACCC        | GCCCTTCATCCTTCCTCT         | 90                |
| LMOD1     | NM_012134     | GAAAAAGGAGGATGAGAAGGT      | GGTGTTTTGGTCTTGCTG         | 129               |
| PTGIS     | NM_000961     | TCCTCCTCTTCCCCTTCCT        | GCCGTTTCCCATCCTTGT         | 132               |
| RERG      | NM_032918     | TTCCCCTTCTGTTCCTCT         | CACGCTAAAACCTCCCAACC       | 120               |
| TAGLN     | NM_003186     | CCAGACTGTTGACCTCTT         | CTCCTGCGCTTTCTTCAT         | 139               |
| PUM1      | NM_001020658  | CACCTCCTTCCCTCTCTT         | ATGTATCTTCCACTGCCATT       | 79                |
| PRDM4     | NM_012406     | CTAACCAAATACCATCTCACCC     | TCATCCTCTTCTTCCTCCTCT      | 89                |
| YWHAZ     | NM_001135699  | GCTCTGGCTTATGGTCTTT        | TCTTTCTCTTTCTCCCCC         | 82                |
